# Supplementary material for: A Mouse Variable Gene Fragment Binds to DNA Independently of the BCR Context: A Possible Role for Immature B-Cell Repertoire Establishment
Source: PubMed Central journal article supplement (PMC3759382; doi:10.1371/journal.pone.0072625), 2013-09-02
Supplement: pone.0072625.s005.pdf [file pone.0072625.s005.pdf]

**Supplementary Table 1**

| VH Family | Prototype | sequences Found <sup>a</sup> | Frequency of Family <sup>b</sup> | Number of Germline Sequences <sup>c</sup> | Frequency of Family / Number of Germlines | Nucleic Acid Binding Sequences <sup>d</sup> | Frequency of ligands in Family <sup>e</sup> | Frequency of Ligands / Number of Germlines <sup>f</sup> |
|-----------|-----------|------------------------------|----------------------------------|-------------------------------------------|-------------------------------------------|---------------------------------------------|---------------------------------------------|---------------------------------------------------------|
| VH1       | J558      | 2,348                        | 66.6                             | 52                                        | 1.28                                      | 422                                         | 18.0                                        | 0.35                                                    |
| VH2       | Q52       | 237                          | 6.7                              | 9                                         | 0.75                                      | 96                                          | 40.5                                        | 4.50                                                    |
| VH3       | 36-60     | 148                          | 4.2                              | 6                                         | 0.70                                      | 19                                          | 12.8                                        | 2.14                                                    |
| VH4       | X-24      | 32                           | 0.9                              | 1                                         | 0.91                                      | 0                                           | 0.0                                         | 0.00                                                    |
| VH5       | 7183      | 327                          | 9.3                              | 10                                        | 0.93                                      | 120                                         | 36.7                                        | 3.67                                                    |
| VH6       | J606      | 101                          | 2.9                              | 5                                         | 0.57                                      | 14                                          | 13.9                                        | 2.77                                                    |
| VH7       | S107      | 170                          | 4.8                              | 3                                         | 1.61                                      | 45                                          | 26.5                                        | 8.82                                                    |
| VH8       | 3609      | 44                           | 1.2                              | 8                                         | 0.16                                      | 5                                           | 11.4                                        | 1.42                                                    |
| VH9       | VGAM3-8   | 66                           | 1.9                              | 4                                         | 0.47                                      | 6                                           | 9.1                                         | 2.27                                                    |
| VH10      | DNA4      | 37                           | 1.1                              | 2                                         | 0.53                                      | 22                                          | 59.5                                        | 29.73                                                   |
| VH11      | CP3       | 9                            | 0.3                              | 2                                         | 0.13                                      | 0                                           | 0.0                                         | 0.00                                                    |
| VH14      | SM7       | 4                            | 0.1                              | 1                                         | 0.11                                      | 0                                           | 0.0                                         | 0.00                                                    |
| TOTAL     |           | 3,523                        | 100.0                            | 103                                       | 0.97                                      | 749                                         |                                             |                                                         |

<sup>a</sup>Number of VH sequences in database

<sup>b</sup>Fraction of sequences of each VH Family

<sup>c</sup>as describe for C57/BL6 (Johnston et al., 2006)

<sup>d</sup>Number of sequences described as anti-DNA

<sup>e</sup>Ratio of nucleic acid binding to the total sequence in Family

<sup>f</sup>Ratio of nucleic acid binding in Family to the number of family's germlines
