# Supplementary material for: A Mouse Variable Gene Fragment Binds to DNA Independently of the BCR Context: A Possible Role for Immature B-Cell Repertoire Establishment
Source: PubMed Central journal article supplement (PMC3759382; doi:10.1371/journal.pone.0072625), 2013-09-02
Supplement: pone.0072625.s006.pdf [file pone.0072625.s006.pdf]

List of the 37 VH IMGT entries

| anti-DNA VH10 |            |                                           | not described as anti-DNA VH10 |            |                                            |
|---------------|------------|-------------------------------------------|--------------------------------|------------|--------------------------------------------|
| GI            | ID         | Annotation                                | GI                             | ID         | Annotation                                 |
| 90696         | I32513     | Ig heavy chain precursor V region (MRL4)  | 285179                         | B42575     | Ig heavy chain V region (anti-angiotensin) |
| 194549        | AAA51055.1 | immunoglobulin heavy chain                | 2253316                        | AAB62898.1 | IgMk heavy chain variable region           |
| 194551        | AAA51056.1 | immunoglobulin heavy chain                | 2253340                        | AAB62910.1 | IgMk heavy chain variable region           |
| 196952        | AAA38849.1 | IgG2ak heavy chain precursor              | 2570571                        | AAB82170.1 | anti-fluorescein monoclonal IgM heavy      |
| 284849        | PH1091     | Ig heavy chain V region (clone P17.79)    | 2570573                        | AAB82171.1 | anti-fluorescein monoclonal IgM heavy      |
| 284850        | PH1092     | Ig heavy chain V region (clone P17.80)    | 5853172                        | AAD54347.1 | immunoglobulin heavy chain variable*       |
| 284851        | PH1093     | Ig heavy chain V region (clone S17.161)   | 5853180                        | AAD54351.1 | immunoglobulin heavy chain variable*       |
| 284962        | A41940     | Ig heavy chain V region G2b, autoantibody | 5853182                        | AAD54352.1 | immunoglobulin heavy chain variable*       |
| 288686        | CAA80054.1 | immunoglobulin variable region            | 29374080                       | AAO73015.1 | anti-meningococcal polysaccharide          |
| 288740        | CAA80056.1 | immunoglobulin variable region            | 52858386                       | AAU89119.1 | anti-preS1 immunoglobulin heavy            |
| 288836        | CAA80067.1 | immunoglobulin variable region            | 61814564                       | AAX56286.1 | anti-lipoteichoic acid heavy chain         |
| 493918        | 1CBV       | H Chain H, An Autoantibody To             | 61814570                       | AAX56288.1 | anti-lipoteichoic acid heavy chain         |
| 494400        | 1NBV       | H Chain H, An Autoantibody To             | 61814580                       | AAX56290.1 | anti-lipoteichoic acid heavy chain         |
| 1872251       | AAB49064.1 | anti-DNA immunoglobulin heavy chain       | 61814592                       | AAX56292.1 | anti-lipoteichoic acid heavy chain         |
| 1872253       | AAB49065.1 | anti-DNA immunoglobulin heavy chain       |                                |            |                                            |
| 1872279       | AAB49078.1 | anti-DNA immunoglobulin heavy chain       |                                |            |                                            |
| 1872361       | AAB49119.1 | anti-DNA immunoglobulin heavy chain       |                                |            |                                            |
| 1872409       | AAB49143.1 | anti-DNA immunoglobulin heavy chain       |                                |            |                                            |
| 1872411       | AAB49144.1 | anti-DNA immunoglobulin heavy chain       |                                |            |                                            |
| 1872413       | AAB49145.1 | anti-DNA immunoglobulin heavy chain       |                                |            |                                            |
| 2906050       | AAC04511.1 | anti-poly(dC) monoclonal antibody         |                                |            |                                            |
| 3309229       | AAC26038.1 | anti-DNA immunoglobulin IgM heavy         |                                |            |                                            |
| 3309239       | AAC26043.1 | anti-DNA immunoglobulin IgM heavy         |                                |            |                                            |

Repeated entree

\*Cross-reactive with DNA
